# Supplementary material for: Improved protein complex prediction with AlphaFold-multimer by denoising the MSA profile
Source: PubMed Central journal article supplement (PMC11302914; doi:10.1371/journal.pcbi.1012253), 2024-07-25
Supplement: pcbi.1012253.s001.pdf [file pcbi.1012253.s001.pdf]

# Supplementary material

## Supplementary figures

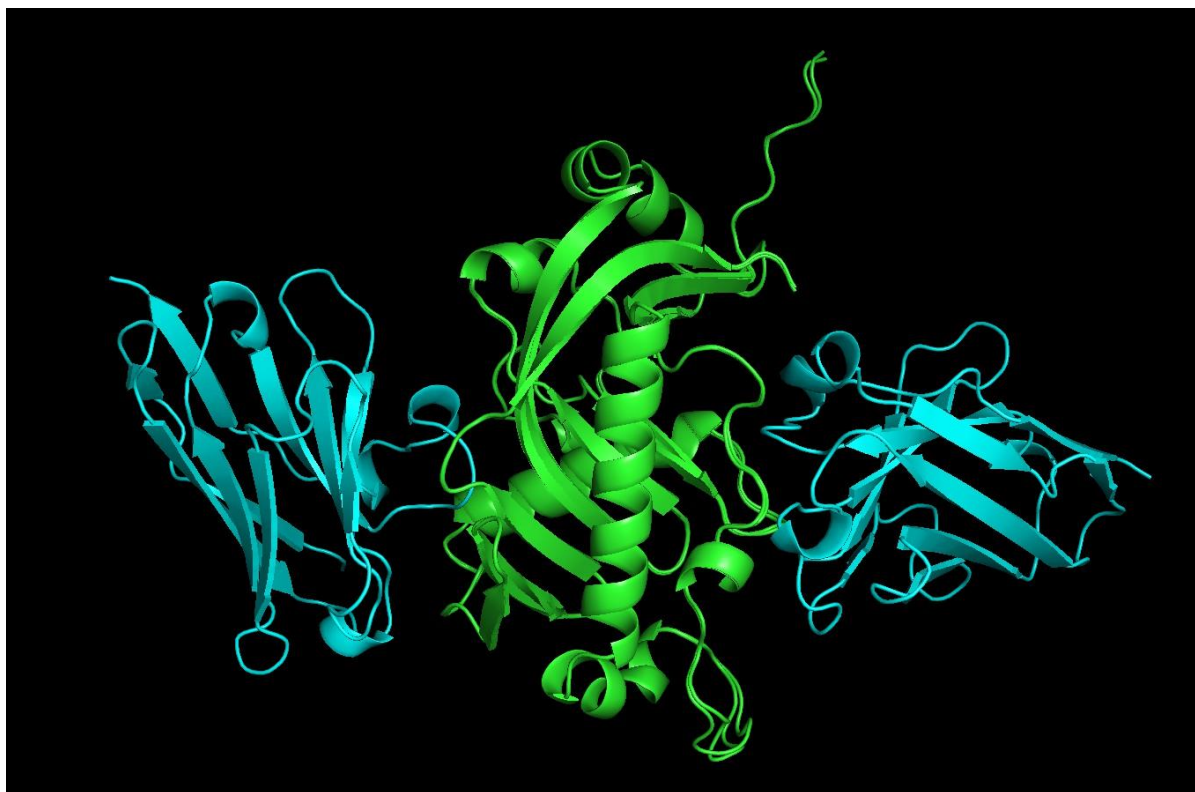

**Supplementary Figure 1.** First (blue chain to the left) and second (blue chain to the right) ranked models superposed on the green chain from AFsample for target H1144.

## MMscores for H1134

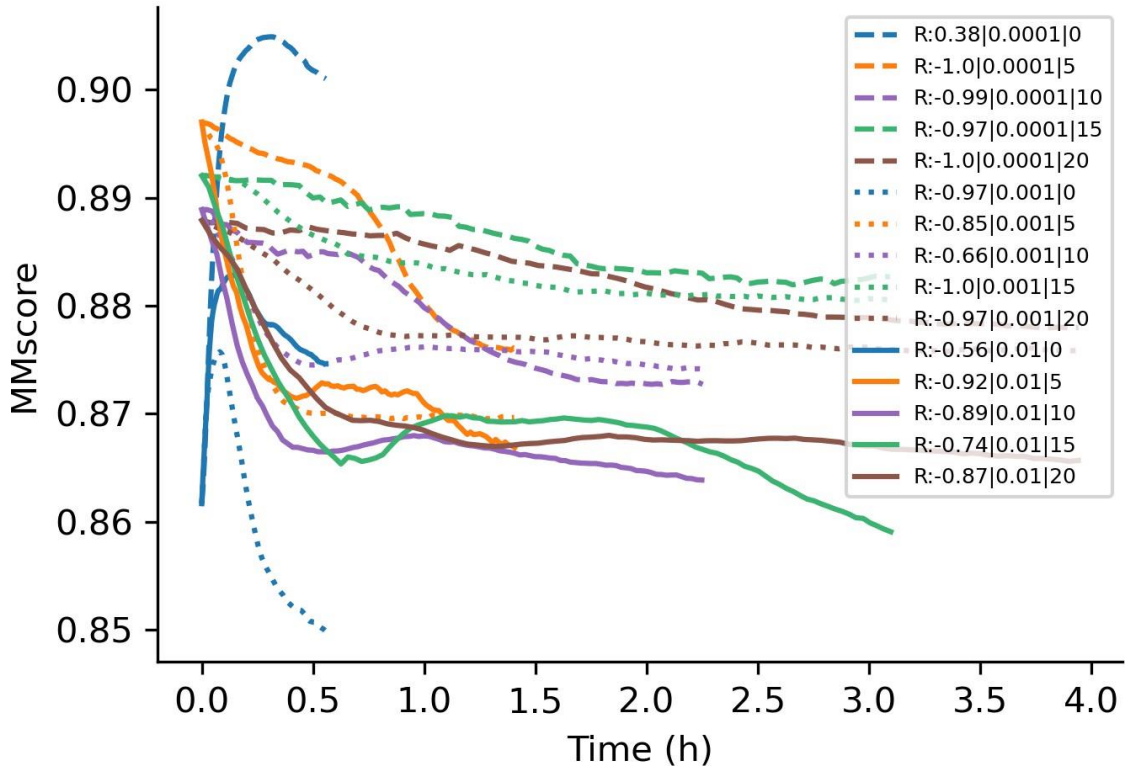

**Supplementary Figure 2.** MMscore vs time for H1134 using different learning rates and recycles. The Spearman correlations (R) are displayed in the figure legend. The MMscore is stable when a good starting position is found for lower learning rates.

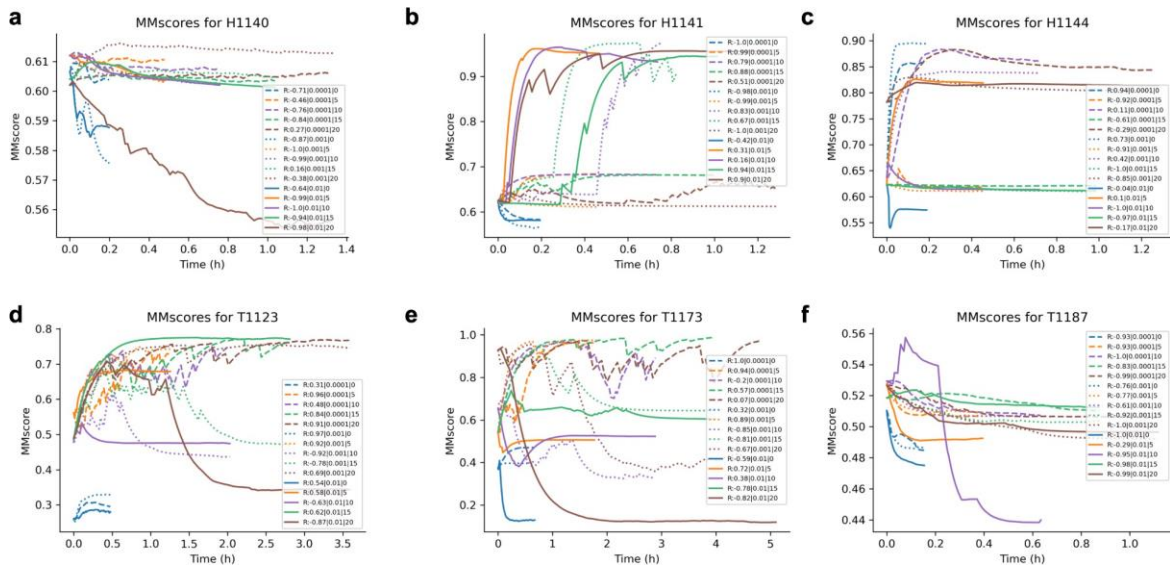

**Supplementary Figure 3.** MMscore vs time for the targets H1141, H1144, H1140, T1123, T1173 and T1187 (a-e). The Spearman correlations (R) are displayed in the figure legend.

The MMscore increases with time and thereby confidence for some settings in all cases except for T1187.

## Supplementary note 1

To estimate how useful the ranking confidence (RC, equation 1) is for AFProfile to select accurate models, we create a ROC curve. AFProfile obtains a ROC AUC of 0.74 in selecting accurate models (MMscore>0.75) using the RC. The AUC is 0.74 compared to 0.5 for a random selection.

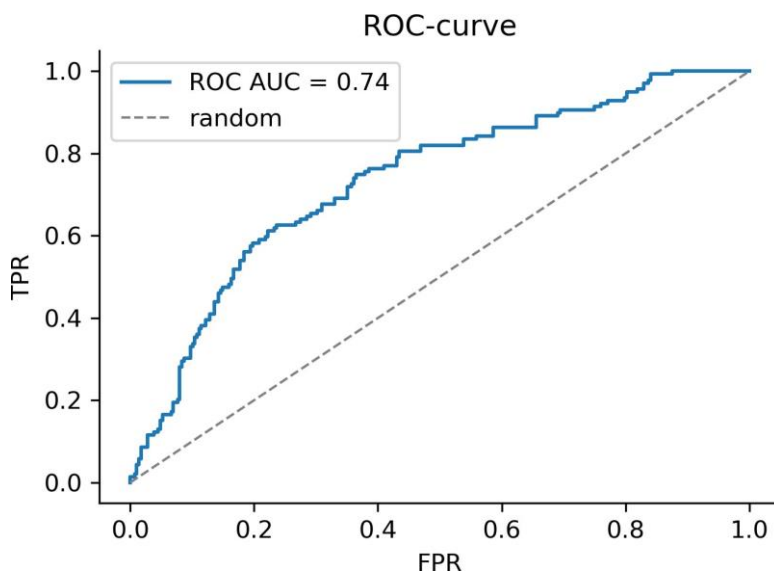

**Supplementary Figure 4.** ROC-curve (FPR vs TPR) for AFProfile in selecting accurate models (MMscore>0.75) using the ranking confidence (equation 1). The AUC is 0.74 compared to 0.5 for a random selection.

## Supplementary note 2

Instead of using MMalign, USalign can also be used. We ran USalign (<https://github.com/pylelab/USalign>) for the top-scoring models in Figure 2 (n=487). It is evident the scores are very similar (Pearson correlation coefficient = 0.996), although USalign provides higher scores in some cases

We ran USalign with the following options:

```
$USALIGN -mm 1 -ter 0 $PRED $NATIVE
```

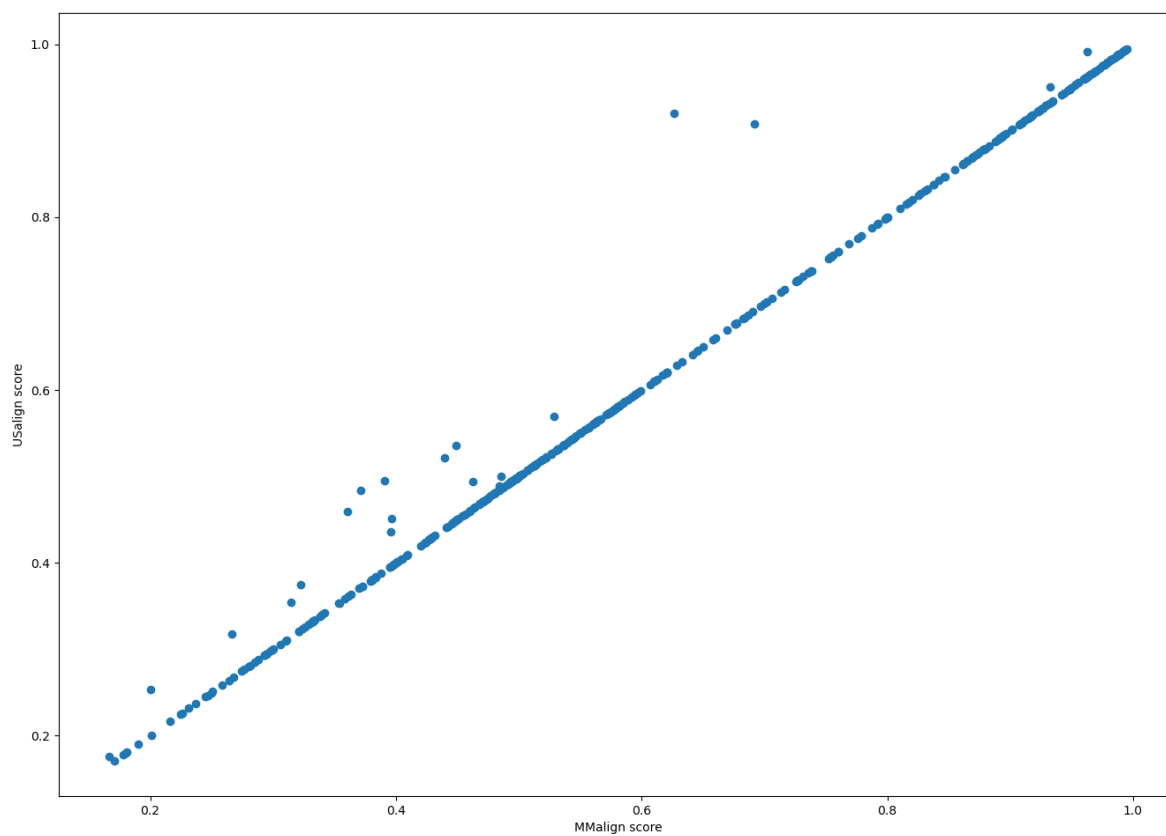

**Supplementary Figure 4.** Comparison of MMalign and USalign TM-scores. In no case does MMalign give a higher score, meaning that this score is more stringent. The Pearson correlation coefficient is 0.996.
